# Supplementary material for: Primary Familial Brain Calcification With XPR1 Mutation Presenting With Cognitive Dysfunction
Source: PubMed Central journal article supplement — J Clin Neurol. 2024 Feb 14;20(2):229–31. doi: 10.3988/jcn.2023.0284 (PMC10921053; doi:10.3988/jcn.2023.0284), 2024-02-14
Supplement: jcn-20-229-s001.pdf [file jcn-20-229-s001.pdf]

**Supplementary Table 1.** The patient's serial cognitive scores

| Variable                      | Initial<br>(November 24, 2020) | After 14 months<br>(January 3, 2022) | After 31 months<br>(June 1, 2023) |
|-------------------------------|--------------------------------|--------------------------------------|-----------------------------------|
| MMSE scores                   |                                |                                      |                                   |
| Time orientation (5)          | 3                              | 5                                    | 4                                 |
| Place orientation (5)         | 5                              | 5                                    | 4                                 |
| Registration (3)              | 3                              | 3                                    | 2                                 |
| Attention/calculation (5)     | 0                              | 0                                    | 0                                 |
| Drawing (1)                   | 1                              | 1                                    | 0                                 |
| Recall (3)                    | 1                              | 1                                    | 3                                 |
| Naming (2)                    | 1                              | 2                                    | 2                                 |
| Verbal commands (3)           | 1                              | 3                                    | 2                                 |
| Repeat (1)                    | 0                              | 1                                    | 1                                 |
| Reading (1)                   | 1                              | 1                                    | 1                                 |
| Writing (1)                   | 1                              | 1                                    | 1                                 |
| Total (30)                    | 17                             | 23                                   | 20                                |
| MoCA scores                   |                                |                                      |                                   |
| Visuospatial/executive (5)    | 2                              | 3                                    | 3                                 |
| Naming (3)                    | 3                              | 3                                    | 3                                 |
| Attention (6)                 | 3                              | 3                                    | 2                                 |
| Language (3)                  | 1                              | 1                                    | 0                                 |
| Abstraction (2)               | 0                              | 0                                    | 0                                 |
| Delayed recall (5)            | 1                              | 2                                    | 1                                 |
| Orientation (6)               | 5                              | 6                                    | 5                                 |
| Total (30)                    | 15                             | 18                                   | 14                                |
| SGDS-K and WAV subscale score |                                |                                      |                                   |
| SGDS-K (15)                   | 9                              | 7                                    | 2                                 |
| WAV (3)                       | 3                              | 1                                    | 1                                 |

Perfect scores are in parenthesis.

MMSE, Mini-Mental State Examination; MoCA, Montreal Cognitive Assessment Test; SGDS-K, Korean version of the Short Form of the Geriatric Depression Scale; WAV, Withdrawal/Apathy/Lack of Vigor.
